# Supplementary material
Source: PubMed Central journal article supplement (PMC10909583)
Supplement: jmcp.2023.23277_s001.pdf [file jmcp.2023.23277_s001.pdf]

## SUPPLEMENTARY MATERIALS

### **Medicare drug price negotiation: The complexities of selecting therapeutic alternatives for estimating comparative effectiveness**

Inmaculada Hernandez, PharmD, PhD; Emma Cousin, PharmD; Olivier J. Wouters, PhD; Nico Gabriel, MA; Teresa Cameron, MS; Sean D. Sullivan, BScPharm, PhD

**SUPPLEMENTARY TABLE 1: ICD-10 Codes Used to Identify Indications**

**SUPPLEMENTARY TABLE 2: Complete List of Potential Therapeutic Alternatives for Eliquis (apixaban)**

**SUPPLEMENTARY TABLE 3: Complete List of Potential Therapeutic Alternatives for Xarelto (rivaroxaban)**

**SUPPLEMENTARY TABLE 4: Complete List of Potential Therapeutic Alternatives for Jardiance (empagliflozin)**

**SUPPLEMENTARY TABLE 5: Complete List of Potential Therapeutic Alternatives for Farxiga (dapagliflozin)**

**SUPPLEMENTARY TABLE 6: Complete List of Potential Therapeutic Alternatives for Januvia (sitagliptin)**

**SUPPLEMENTARY TABLE 7: Complete List of Potential Therapeutic Alternatives for Fiasp/Novolog (Insulin Aspart)**

**SUPPLEMENTARY TABLE 8: Complete List of Potential Therapeutic Alternatives for Entresto (sacubitril-valsartan)**

**SUPPLEMENTARY TABLE 9: Complete List of Potential Therapeutic Alternatives for Enbrel (etanercept)**

**SUPPLEMENTARY TABLE 10: Complete List of Potential Therapeutic Alternatives for Stelara (ustekinumab)**

**SUPPLEMENTARY TABLE 11: Complete List of Potential Therapeutic Alternatives for Imbruvica (ibrutinib)**

**Supplemental Table 1: ICD-10 Codes Used to Identify Indications**

| <b>Condition</b>                                          | <b>ICD-10 Codes</b>                                                                                                             |
|-----------------------------------------------------------|---------------------------------------------------------------------------------------------------------------------------------|
| Treatment and prevention of venous thromboembolisms       | I260, I269, T790, T291, T800, T817, T828, O032, O037, O047, O072, O082, Z790, O087, I824, I825, I826, I827, O871, I2782, Z86711 |
| Atrial Fibrillation                                       | I480, I481, I482, I489                                                                                                          |
| Coronary Artery Disease                                   | I20, I21, I22, I23, I24, I25, I200, I208, I209, I251, I252, I253, I254, I255, I257, I258, I259, Z951, Q249, Z299                |
| Peripheral Artery Disease                                 | I78, E105, E115, E135, I701, I702, I703, I704, I705, I706, I707, I709, I7389                                                    |
| Type 2 Diabetes Mellitus                                  | E110, E111, E112, E113, E114, E115, E116, E118, E119, R730, R739, Z7984                                                         |
| Knee / Hip Replacement                                    | Healthcare Common Procedure Coding System<br>Procedure codes: 27130, 27134, 27137, 27138, 27446, 27447, 27487                   |
| Heart Failure                                             | I501, I502, I503, I504, I508, I509                                                                                              |
| Atherosclerotic Cardiovascular Disease                    | I70, I2582, I251, I252, I253, I254, I255, I256, I257, I258, I259, I200, I201, I202, I208, I209, I237                            |
| Chronic kidney disease                                    | E112, I120, I129, I130, I131, I132, N181, N182, N183, N184, N185, N186, N187, N188, N189                                        |
| Rheumatoid Arthritis                                      | M05, M060, M062, M063, M064, M068, M069, M080, M082, M083, M084                                                                 |
| Ankylosing Spondylitis                                    | M081, M246, M450, M451, M452, M453, M454, M455, M456, M457, M458, M459                                                          |
| Plaque psoriasis                                          | L400, L408, L409                                                                                                                |
| Psoriatic arthritis                                       | L4052, L4051, L4054, L4059                                                                                                      |
| Crohn's disease                                           | K5000, K5001, K5010, K5011, K5080, K5081, K5090, K5091                                                                          |
| Ulcerative Colitis                                        | K510, K515, K5101, K5120, K5121, K5130, K5131, K5151, K5180, K5181, K5190, K5191                                                |
| Chronic Lymphocytic Leukemia / Small Lymphocytic Lymphoma | C9110, C9111, C9112, C8300, C8301, C8302, C8303, C8304, C8305, C8306, C8307, C8308, C8309                                       |
| Waldenstrom's macroglobulinemia                           | C880                                                                                                                            |
| Chronic Graft Versus Host Disease                         | D89811                                                                                                                          |
| Glycemic Control                                          | E08, E09, E10, E11, E13, O24, Z79, E891, R730                                                                                   |

**Supplemental Table 2: Complete List of Potential Therapeutic Alternatives for Eliquis (apixaban)**

| FDA-Approved Indications                                                              | Potential Therapeutic Alternatives |              |            |                              |                                     |             |         |
|---------------------------------------------------------------------------------------|------------------------------------|--------------|------------|------------------------------|-------------------------------------|-------------|---------|
|                                                                                       | <u>Within class</u>                |              |            | <u>Outside of class</u>      |                                     |             |         |
|                                                                                       | Class                              | Generic Name | Brand Name | Class                        | Generic Name                        | Brand Name  |         |
| <b>Treatment and prevention of VTEs</b>                                               | <b>Direct factor xa inhibitor</b>  | Rivaroxaban  | Xarelto    | <b>Heparins</b>              | Unfractionated heparin              |             |         |
|                                                                                       |                                    | Edoxaban     | Savaysa    |                              | <i>Low molecular weight heparin</i> | Enoxaparin  | Lovenox |
|                                                                                       |                                    | Fondaparinux | Arixtra    |                              |                                     | Dalteparin  | Fragmin |
|                                                                                       | <b>Direct thrombin inhibitor</b>   | Dabigatran   | Pradaxa    | <b>Vitamin K antagonists</b> | Warfarin                            | Coumadin    |         |
| <b>Non-valvular atrial fibrillation</b>                                               | <b>Direct factor xa inhibitor</b>  | Rivaroxaban  | Xarelto    | <b>Heparins</b>              | Unfractionated heparin              |             |         |
|                                                                                       |                                    | Edoxaban     | Savaysa    |                              | <i>Low molecular weight heparin</i> | Enoxaparin* | Lovenox |
|                                                                                       | <b>Direct thrombin inhibitor</b>   | Dabigatran   | Pradaxa    | <b>Vitamin K antagonists</b> | Warfarin                            | Coumadin    |         |
| <b>DVT prophylaxis in patients who have undergone hip or knee replacement surgery</b> | <b>Direct factor xa inhibitor</b>  | Apixaban     | Eliquis    | <b>Heparins</b>              | Unfractionated heparin              |             |         |
|                                                                                       |                                    | Fondaparinux | Arixtra    |                              | <i>Low molecular weight heparin</i> | Enoxaparin  | Lovenox |
|                                                                                       | <b>Direct thrombin inhibitor</b>   | Dabigatran   | Pradaxa    |                              | Dalteparin                          | Fragmin     |         |
|                                                                                       |                                    |              |            | <b>Vitamin K antagonists</b> | Warfarin                            | Coumadin    |         |

Abbreviations: VTE = venous thromboembolism; DVT = deep venous thrombosis.

\*Recommended by clinical guidelines,<sup>1,2</sup> but not FDA-approved

**Supplemental Table 3: Complete List of Potential Therapeutic Alternatives for Xarelto (rivaroxaban)**

| FDA-Approved Indications                                                              | Potential Therapeutic Alternatives |              |         |                                     |                                     |             |         |
|---------------------------------------------------------------------------------------|------------------------------------|--------------|---------|-------------------------------------|-------------------------------------|-------------|---------|
|                                                                                       | <u>Within class</u>                |              |         | <u>Outside of class</u>             |                                     |             |         |
|                                                                                       | Class                              | Generic      | Brand   | Class                               | Generic                             | Brand       |         |
| <b>Treatment and prevention of VTEs</b>                                               | <b>Direct factor xa inhibitor</b>  | Apixaban     | Eliquis | <b>Heparins</b>                     | Unfractionated heparin              |             |         |
|                                                                                       |                                    | Edoxaban     | Savaysa |                                     | <i>Low molecular weight heparin</i> | Dalteparin  | Fragmin |
|                                                                                       |                                    | Fondaparinux | Arixtra |                                     |                                     | Enoxaparin  | Lovenox |
|                                                                                       | <b>Direct thrombin inhibitor</b>   | Dabigatran   | Pradaxa | <b>Vitamin K antagonists</b>        | Warfarin                            | Coumadin    |         |
| <b>Non-valvular atrial fibrillation</b>                                               | <b>Direct factor xa inhibitor</b>  | Apixaban     | Eliquis | <b>Heparins</b>                     | Unfractionated heparin              |             |         |
|                                                                                       |                                    | Edoxaban     | Savaysa | <i>Low molecular weight heparin</i> | Enoxaparin*                         | Lovenox     |         |
|                                                                                       | <b>Direct thrombin inhibitor</b>   | Dabigatran   | Pradaxa | <b>Vitamin K antagonists</b>        | Warfarin                            | Coumadin    |         |
| <b>Reducing the risk of CV events in CAD/PAD</b>                                      | No medications in this class       |              |         | <b>Antiplatelets</b>                | Aspirin                             |             |         |
|                                                                                       |                                    |              |         |                                     |                                     | Clopidogrel | Plavix  |
|                                                                                       |                                    |              |         |                                     | Vorapaxar                           | Zontivity   |         |
|                                                                                       |                                    |              |         | <b>Vitamin K antagonists</b>        | Warfarin                            | Coumadin    |         |
| <b>DVT prophylaxis in patients who have undergone hip or knee replacement surgery</b> | <b>Direct factor xa inhibitor</b>  | Apixaban     | Eliquis | <b>Heparins</b>                     | Unfractionated heparin              |             |         |
|                                                                                       |                                    | Fondaparinux | Arixtra | <i>Low molecular weight heparin</i> | Dalteparin                          | Fragmin     |         |
|                                                                                       | <b>Direct thrombin inhibitor</b>   | Dabigatran   | Pradaxa |                                     | Enoxaparin                          | Lovenox     |         |
|                                                                                       |                                    |              |         | <b>Vitamin K antagonists</b>        | Warfarin                            | Coumadin    |         |

Abbreviations: CV = cardiovascular; VTE = venous thromboembolism; CAD = coronary artery disease; PAD = peripheral artery disease; DVT = deep venous thrombosis

\*Recommended by clinical guidelines,<sup>1,2</sup> but not FDA-approved

**Supplemental Table 4: Complete List of Potential Therapeutic Alternatives for Jardiance (empagliflozin)**

| FDA-Approved Indications                                               | Potential Therapeutic Alternatives |                |           |                              |                      |                                              |
|------------------------------------------------------------------------|------------------------------------|----------------|-----------|------------------------------|----------------------|----------------------------------------------|
|                                                                        | <u>Within class</u>                |                |           | <u>Outside of class</u>      |                      |                                              |
|                                                                        | Class                              | Generic        | Brand     | Class                        | Generic              | Brand                                        |
| <b>Reduce the risk of CV death and hospitalization for HF</b>          | SGLT-2i                            | Dapagliflozin  | Farxiga   | Beta-blockers*               | Bisoprolol           |                                              |
|                                                                        |                                    | Sotagliflozin  | Inpefa    |                              | Carvedilol           | Coreg CR                                     |
|                                                                        |                                    | Canagliflozin* | Invokana  |                              | Metoprolol succinate | Lopressor, Toprol XL                         |
|                                                                        |                                    | Ertugliflozin* | Steglatro |                              |                      |                                              |
| <b>Reduce CV death in T2D and established CVD</b>                      | SGLT-2i                            | Dapagliflozin  | Farxiga   | GLP-1 agonists*              | Exenatide            | Byetta, Bydureon                             |
|                                                                        |                                    | Sotagliflozin  | Inpefa    |                              | Lixisenatide         | Adlyxin                                      |
|                                                                        |                                    | Canagliflozin* | Invokana  |                              | Dulaglutide          | Trulicity                                    |
|                                                                        |                                    | Ertugliflozin* | Steglatro |                              | Liraglutide          | Victoza                                      |
|                                                                        |                                    |                |           | Semaglutide                  | Ozempic, Rybelsus    |                                              |
| <b>Adjunct to diet and exercise to improve glycemic control in T2D</b> | SGLT-2i                            | Canagliflozin  | Invokana  | Biguanides                   | Metformin            | Fortamet, Glumetza, Riomet, Glucophage, etc. |
|                                                                        |                                    | Dapagliflozin  | Farxiga   |                              | TZDs                 | Pioglitazone                                 |
|                                                                        |                                    | Ertugliflozin  | Steglatro | Rosiglitazone                |                      | Avandia                                      |
|                                                                        |                                    |                |           | Sulfonylureas                | Glimeperide          | Amaryl                                       |
|                                                                        |                                    |                |           |                              | Glipizide            | Glucotrol                                    |
|                                                                        |                                    |                |           |                              | Glyburide            | Glynase                                      |
|                                                                        |                                    |                |           | Meglitinides                 | Nateglinide          | Starlix                                      |
|                                                                        |                                    |                |           | GLP-1 agonists               | Exenatide            | Byetta, Bydureon                             |
|                                                                        |                                    |                |           |                              | Lixisenatide         | Adlyxin                                      |
|                                                                        |                                    |                |           |                              | Dulaglutide          | Trulicity                                    |
|                                                                        |                                    |                |           |                              | Liraglutide          | Victoza                                      |
|                                                                        |                                    |                |           |                              | Semaglutide          | Ozempic, Rybelsus                            |
|                                                                        |                                    |                |           | Alpha-glucosidase inhibitors | Miglitol             | Glyset                                       |
|                                                                        |                                    |                |           |                              | DPP-4 inhibitors     | Saxagliptin                                  |
|                                                                        |                                    |                |           | Sitagliptin                  |                      | Januvia                                      |
|                                                                        |                                    |                |           | Linagliptin                  |                      | Tradjenta                                    |

|                                                                                                                                        |         |               |             |                 |                   |                  |
|----------------------------------------------------------------------------------------------------------------------------------------|---------|---------------|-------------|-----------------|-------------------|------------------|
|                                                                                                                                        |         |               |             | Alogliptin      | Nesina            |                  |
| <b>Reduce the risk of sustained eGFR decline, ESKD, CV death and hospitalization for HF, in adults with CKD at risk of progression</b> | SGLT-2i | Dapagliflozin | Farxiga     | GLP-1 agonists* | Exenatide         | Byetta, Bydureon |
|                                                                                                                                        |         | Sotagliflozin | Inpefa      |                 | Lixisenatide      | Adlyxin          |
|                                                                                                                                        |         |               | Dulaglutide |                 | Trulicity         |                  |
|                                                                                                                                        |         |               | Liraglutide |                 | Victoza           |                  |
|                                                                                                                                        |         |               | Semaglutide |                 | Ozempic, Rybelsus |                  |
|                                                                                                                                        |         |               | MRA         |                 | Finerenone        | Kerendia         |

Abbreviations: CV = cardiovascular; T2D = type 2 diabetes; HF = heart failure; TZD = thiazolidinediones; eGFR = estimated glomerular filtration rate; GLP-1 = glucagon-like peptide 1; ESKD = end-stage kidney disease; CKD = chronic kidney disease; SGLT-2i = sodium-glucose transport protein 2 inhibitors; MRA = aldosterone receptor antagonists; DPP-4 = dipeptidyl peptidase-4

\*Recommended by clinical guidelines,<sup>3-5</sup> but not FDA-approved

**Supplemental Table 5: Complete List of Potential Therapeutic Alternatives for Farxiga (dapagliflozin)**

| FDA-Approved Indications                                                                                                         | Potential Therapeutic Alternatives |                |           |                         |                                     |                                              |                   |
|----------------------------------------------------------------------------------------------------------------------------------|------------------------------------|----------------|-----------|-------------------------|-------------------------------------|----------------------------------------------|-------------------|
|                                                                                                                                  | <u>Within class</u>                |                |           | <u>Outside of class</u> |                                     |                                              |                   |
|                                                                                                                                  | Class                              | Generic        | Brand     | Class                   | Generic                             | Brand                                        |                   |
| <b>Reduce the risk of CV death and hospitalization for HFrEF (NYHA - Class II-IV)</b>                                            | <b>SGLT-2i</b>                     | Empagliflozin  | Jardiance | <b>Beta-blockers*</b>   | Bisoprolol                          |                                              |                   |
|                                                                                                                                  |                                    | Sotagliflozin  | Inpefa    |                         | Carvedilol                          | Coreg CR                                     |                   |
|                                                                                                                                  |                                    | Canagliflozin* | Invokana  |                         | Metoprolol succinate                | Lopressor, Toprol XL                         |                   |
|                                                                                                                                  |                                    | Ertugliflozin* | Steglatro |                         |                                     |                                              |                   |
| <b>Reduce the risk of hospitalization for HF in adults with T2DM and established CVD or multiple cardiovascular risk factors</b> | <b>SGLT-2i</b>                     | Empagliflozin  | Jardiance | <b>GLP-1 agonists*</b>  | Exenatide                           | Byetta, Bydureon                             |                   |
|                                                                                                                                  |                                    | Sotagliflozin  | Inpefa    |                         | Lixisenatide                        | Adlyxin                                      |                   |
|                                                                                                                                  |                                    | Canagliflozin* | Invokana  |                         | Dulaglutide                         | Trulicity                                    |                   |
|                                                                                                                                  |                                    | Ertugliflozin* | Steglatro |                         | Liraglutide                         | Victoza                                      |                   |
|                                                                                                                                  |                                    |                |           | Semaglutide             | Ozempic, Rybelsus                   |                                              |                   |
| <b>Adjunct to diet and exercise to improve glycemic control in T2DM</b>                                                          | <b>SGLT-2i</b>                     | Canagliflozin  | Invokana  | <b>Biguanides</b>       | Metformin                           | Fortamet, Glumetza, Riomet, Glucophage, etc. |                   |
|                                                                                                                                  |                                    | Empagliflozin  | Jardiance |                         |                                     |                                              |                   |
|                                                                                                                                  |                                    | Ertugliflozin  | Steglatro |                         |                                     |                                              |                   |
|                                                                                                                                  |                                    |                |           |                         | <b>TZDs</b>                         | Pioglitazone                                 | Actos             |
|                                                                                                                                  |                                    |                |           |                         |                                     | Rosiglitazone                                | Avandia           |
|                                                                                                                                  |                                    |                |           |                         | <b>Sulfonylureas</b>                | Glimeperide                                  | Amaryl            |
|                                                                                                                                  |                                    |                |           |                         |                                     | Glipizide                                    | Glucocetrol       |
|                                                                                                                                  |                                    |                |           |                         |                                     | Glyburide                                    | Glynase           |
|                                                                                                                                  |                                    |                |           |                         | <b>Meglitinides</b>                 | Nateglinide                                  | Starlix           |
|                                                                                                                                  |                                    |                |           |                         | <b>GLP-1 agonists</b>               | Exenatide                                    | Byetta, Bydureon  |
|                                                                                                                                  |                                    |                |           |                         |                                     | Lixisenatide                                 | Adlyxin           |
|                                                                                                                                  |                                    |                |           |                         |                                     | Dulaglutide                                  | Trulicity         |
|                                                                                                                                  |                                    |                |           |                         |                                     | Liraglutide                                  | Victoza           |
|                                                                                                                                  |                                    |                |           |                         |                                     | Semaglutide                                  | Ozempic, Rybelsus |
|                                                                                                                                  |                                    |                |           |                         | <b>Alpha-glucosidase inhibitors</b> | Miglitol                                     | Glyset            |
|                                                                                                                                  |                                    |                |           |                         | <b>DPP-4 inhibitors</b>             | Saxagliptin                                  | Onglyza           |
|                                                                                                                                  |                                    |                |           |                         |                                     | Sitagliptin                                  | Januvia           |
|                                                                                                                                  |                                    |                |           | Linagliptin             |                                     | Tradjenta                                    |                   |
|                                                                                                                                  |                                    |                |           | Alogliptin              |                                     | Nesina                                       |                   |

|                                                                                                                                        |                |               |             |                        |                   |                  |
|----------------------------------------------------------------------------------------------------------------------------------------|----------------|---------------|-------------|------------------------|-------------------|------------------|
| <b>Reduce the risk of sustained eGFR decline, ESKD, CV death and hospitalization for HF, in adults with CKD at risk of progression</b> | <b>SGLT-2i</b> | Empagliflozin | Jardiance   | <b>GLP-1 agonists*</b> | Exanatide         | Byetta, Bydureon |
|                                                                                                                                        |                | Sotagliflozin | Inpefa      |                        | Lixisenatide      | Adlyxin          |
|                                                                                                                                        |                |               | Dulaglutide |                        | Trulicity         |                  |
|                                                                                                                                        |                |               | Liraglutide |                        | Victoza           |                  |
|                                                                                                                                        |                |               | Semaglutide |                        | Ozempic, Rybelsus |                  |
|                                                                                                                                        |                |               | <b>MRAs</b> | Finerenone             | Kerendia          |                  |

Abbreviations: CV = cardiovascular; CVD = cardiovascular disease; T2DM = type 2 diabetes mellitus; HFrEF = heart failure reduced ejection fraction; HF = heart failure; TZD = thiazolidinediones; eGFR = estimated glomerular filtration rate; GLP-1 = glucagon-like peptide 1; ESKD = end-stage kidney disease; CKD = chronic kidney disease; SGLT-2i = sodium-glucose transport protein 2 inhibitors; MRA = aldosterone receptor antagonists; DPP-4 = dipeptidyl peptidase-4.

\*Recommended by clinical guidelines,<sup>3-5</sup> but not FDA-approved



**Supplemental Table 6: Complete List of Potential Therapeutic Alternatives for Januvia (sitagliptin)**

| FDA-<br>Approved<br>Indications                                         | Potential Therapeutic Alternatives  |                   |           |                         |                       |                                              |                  |
|-------------------------------------------------------------------------|-------------------------------------|-------------------|-----------|-------------------------|-----------------------|----------------------------------------------|------------------|
|                                                                         | <u>Within class</u>                 |                   |           | <u>Outside of class</u> |                       |                                              |                  |
|                                                                         | Class                               | Generic           | Brand     | Class                   | Generic               | Brand                                        |                  |
| <b>Adjunct to diet and exercise to improve glycemic control in T2DM</b> | <b>DPP-4 inhibitors</b>             | Saxagliptin       | Onglyza   | <b>Biguanides</b>       | Metformin             | Fortamet, Glumetza, Riomet, Glucophage, etc. |                  |
|                                                                         |                                     | Linagliptin       | Tradjenta |                         | <b>TZDs</b>           | Pioglitazone                                 | Actos            |
|                                                                         |                                     | Alogliptin        | Nesina    |                         |                       | Rosiglitazone                                | Avandia          |
|                                                                         | <b>Sulfonylureas</b>                |                   |           |                         |                       | Glimeperide                                  | Amaryl           |
|                                                                         |                                     |                   |           |                         | Glipizide             | Glucotrol                                    |                  |
|                                                                         |                                     |                   |           |                         | Glyburide             | Glynase                                      |                  |
|                                                                         | <b>Meglitinides</b>                 |                   |           |                         | Nateglinide           | Starlix                                      |                  |
|                                                                         |                                     |                   |           |                         | <b>GLP-1 agonists</b> | Exenatide                                    | Byetta, Bydureon |
|                                                                         |                                     |                   |           |                         |                       | Lixisenatide                                 | Adlyxin          |
|                                                                         | Dulaglutide                         | Trulicity         |           |                         |                       |                                              |                  |
|                                                                         | Liraglutide                         | Victoza           |           |                         |                       |                                              |                  |
|                                                                         | Semaglutide                         | Ozempic, Rybelsus |           |                         |                       |                                              |                  |
|                                                                         | <b>Alpha-glucosidase inhibitors</b> |                   |           |                         | Miglitol              | Glyset                                       |                  |
|                                                                         |                                     |                   |           |                         | <b>SGLT-2i</b>        | Canagliflozin                                | Invokana         |
|                                                                         | Dapagliflozin                       | Farxiga           |           |                         |                       |                                              |                  |
| Empagliflozin                                                           | Jardiance                           |                   |           |                         |                       |                                              |                  |
| Ertugliflozin                                                           | Steglatro                           |                   |           |                         |                       |                                              |                  |

Abbreviations: T2DM = type 2 diabetes mellitus; TZD = thiazolidinediones; GLP-1 = glucagon-like peptide 1; SGLT-2i = sodium-glucose transport protein 2 inhibitors; DPP-4 = dipeptidyl peptidase-4

**Supplemental Table 7: Complete List of Potential Therapeutic Alternatives for Fiasp/Novolog (Insulin Aspart)**

| FDA-<br>Approved<br>Indications      | Potential Therapeutic Alternatives |                 |                           |                             |                                |                                              |
|--------------------------------------|------------------------------------|-----------------|---------------------------|-----------------------------|--------------------------------|----------------------------------------------|
|                                      | <u>Within class</u>                |                 |                           | <u>Outside of class</u>     |                                |                                              |
|                                      | Class                              | Generic         | Brand                     | Class                       | Generic                        | Brand                                        |
| <b>Glycemic control for Diabetes</b> | <b><i>Insulins</i></b>             |                 |                           | <b><i>Insulins</i></b>      |                                |                                              |
|                                      | <i>Ultra-rapid acting</i>          | Inhaled insulin | Afrezza                   | <i>Short-acting</i>         | Regular                        | Humulin R, Novolin R, Myxredlin              |
|                                      | <i>Rapid-acting</i>                | Lispro          | Humalog, Admelog, Lyumjev | <i>Intermediate acting</i>  | NPH                            | Humulin N, Novolin N                         |
|                                      |                                    | Glulisine       | Apidra                    |                             | <i>Long-acting</i>             | Detemir                                      |
|                                      |                                    |                 |                           | Glargine                    |                                | Lantus, Basaglar, Rezvoglar, Semglee, Toujeo |
|                                      |                                    |                 |                           | Degludec                    |                                | Tresiba                                      |
|                                      |                                    |                 |                           | <i>Combination products</i> | 70 NPH, 30 regular             | Humulin 70/30, Novolin 70/30                 |
|                                      |                                    |                 |                           |                             | 75 lispro protamine, 25 lispro | Humalog 75/25                                |
|                                      |                                    |                 |                           |                             | 50 lispro protamine, 50 lispro | Humalog 50/50                                |
|                                      |                                    |                 |                           |                             | 70 aspart protamine, 30 aspart | Novolog 70/30                                |

Abbreviations: NPH = Neutral Protamine Hagedorn.

**Supplemental Table 8: Complete List of Potential Therapeutic Alternatives for Entresto (sacubitril-valsartan)**

| FDA-Approved Indications                                                                                                                                              | Potential Therapeutic Alternatives |                               |       |                         |            |                  |            |             |         |
|-----------------------------------------------------------------------------------------------------------------------------------------------------------------------|------------------------------------|-------------------------------|-------|-------------------------|------------|------------------|------------|-------------|---------|
|                                                                                                                                                                       | <u>Within class</u>                |                               |       | <u>Outside of class</u> |            |                  |            |             |         |
|                                                                                                                                                                       | Class                              | Generic                       | Brand | Class                   | Generic    | Brand            |            |             |         |
| <b><i>Reduce the risk of CV death and hospitalization for HF in adult patients with CHF. Benefits are most clearly evident in patients with LVEF below normal</i></b> | <b>ARNI</b>                        | (no other drug in this class) |       | <b>ACEi</b>             | Captopril  |                  |            |             |         |
|                                                                                                                                                                       |                                    |                               |       |                         | Enalapril  | Epaned, Vasotec  |            |             |         |
|                                                                                                                                                                       |                                    |                               |       |                         | Lisinopril | Qbrelis, Zestril |            |             |         |
|                                                                                                                                                                       |                                    |                               |       |                         |            |                  | <b>ARB</b> | Candesartan | Atacand |
|                                                                                                                                                                       |                                    |                               |       |                         |            | Losartan         |            | Cozaar      |         |
|                                                                                                                                                                       |                                    |                               |       |                         |            | Valsartan        |            | Diovan      |         |
|                                                                                                                                                                       |                                    |                               |       |                         |            |                  |            |             |         |

Abbreviations: CV = cardiovascular; HF = heart failure; CHF = chronic heart failure; LVEF = left ventricular ejection fraction; ARNI = angiotensin receptor-neprilysin inhibitor; ACEi = angiotensin converting enzyme inhibitor; ARB = angiotensin II receptor blocker.

Based on Heidenreich 2022 AHA/ACC/HFSA Guideline for the Management of Heart Failure.<sup>3</sup>

**Supplemental Table 9: Complete List of Potential Therapeutic Alternatives for Enbrel (etanercept)**

| FDA-<br>Approved<br>Indications | Potential Therapeutic Alternatives |              |                                                           |                                       |                                            |                                            |
|---------------------------------|------------------------------------|--------------|-----------------------------------------------------------|---------------------------------------|--------------------------------------------|--------------------------------------------|
|                                 | <u>Within class</u>                |              |                                                           | <u>Outside of class</u>               |                                            |                                            |
|                                 | Class                              | Generic      | Brand                                                     | Class                                 | Generic                                    | Brand                                      |
| <b>Rheumatoid Arthritis</b>     | <b>bDMARDs</b>                     |              |                                                           | <b>bDMARDs</b>                        |                                            |                                            |
|                                 | <i>Anti-TNFs</i>                   | Adalimumab   | Humira, Amgevita, Hyrimoz, Idacio, Imraldi, Yuflyma, etc. | <i>T-cell costimulatory inhibitor</i> | Abatacept                                  | Orencia                                    |
|                                 |                                    |              |                                                           | <i>IL-6 receptor inhibitor</i>        | Tocilizumab                                | Actemra                                    |
|                                 |                                    |              |                                                           |                                       | Sarilumab                                  | Kevzara                                    |
|                                 |                                    |              |                                                           | <i>Anti-CD20 antibody</i>             | Rituximab                                  | Rituxan                                    |
|                                 |                                    | Certolizumab | Cimzia                                                    | <i>IL-1 inhibitor</i>                 | Anakinra                                   | Kineret                                    |
|                                 |                                    | Infliximab   | Remicade                                                  | <b>csDMARDs</b>                       | Hydroxychloroquine                         | Plaquenil                                  |
|                                 |                                    | Golimumab    | Simponi                                                   |                                       | Sulfasalazine*                             | Azulfidine                                 |
|                                 |                                    |              |                                                           |                                       | Methotrexate                               | Otrexup, Rasuvo, RediTrex, Trexall, Xatmep |
|                                 |                                    |              |                                                           |                                       | Leflunomide                                | Arava                                      |
|                                 |                                    |              | Cyclosporine†                                             |                                       | Neoral, Sandimmune, Gengraf                |                                            |
|                                 |                                    |              | <b>tsDMARDs</b>                                           |                                       |                                            |                                            |
|                                 |                                    |              | <i>JAK inhibitors</i>                                     | Tofacitinib                           | Xeljanz                                    |                                            |
|                                 |                                    |              |                                                           | Baricitinib                           | Olumiant                                   |                                            |
|                                 |                                    |              |                                                           | Upadacitinib                          | Rinvoq                                     |                                            |
| <b>Ankylosing spondylitis</b>   | <b>bDMARDs</b>                     |              |                                                           | <b>bDMARDs</b>                        |                                            |                                            |
|                                 | <i>Anti-TNFs</i>                   | Adalimumab   | Humira, Amgevita, Hyrimoz, Idacio, Imraldi, Yuflyma, etc. | <i>IL-17 inhibitor</i>                | Secukinumab                                | Cosentyx                                   |
|                                 |                                    |              |                                                           |                                       | Ixekizumab                                 | Taltz                                      |
|                                 |                                    |              |                                                           |                                       |                                            |                                            |
|                                 |                                    |              |                                                           |                                       |                                            |                                            |
|                                 | Certolizumab                       | Cimzia       | <b>csDMARDs</b>                                           | Sulfasalazine*                        | Azulfidine                                 |                                            |
|                                 | Infliximab                         | Remicade     |                                                           | Methotrexate*                         | Otrexup, Rasuvo, RediTrex, Trexall, Xatmep |                                            |
|                                 | Golimumab                          | Simponi      |                                                           |                                       |                                            |                                            |
|                                 |                                    |              | <b>tsDMARDs</b>                                           |                                       |                                            |                                            |

|  |  |                       |                              |                   |
|--|--|-----------------------|------------------------------|-------------------|
|  |  | <i>JAK inhibitors</i> | Upadacitinib†<br>Tofacitinib | Rinvoq<br>Xeljanz |
|--|--|-----------------------|------------------------------|-------------------|

**Supplemental Table 9 Continued**

|                                   |                                                                                                                                                                                                   |                                                                                                                                                                                                                                                                                                                                                                                                                                                                                                                                                                         |
|-----------------------------------|---------------------------------------------------------------------------------------------------------------------------------------------------------------------------------------------------|-------------------------------------------------------------------------------------------------------------------------------------------------------------------------------------------------------------------------------------------------------------------------------------------------------------------------------------------------------------------------------------------------------------------------------------------------------------------------------------------------------------------------------------------------------------------------|
| <p><b>Plaque Psoriasis</b></p>    | <p><b>bDMARDs</b></p> <p><i>Anti-TNFs</i> Adalimumab Humira, Amgevita, Hyrimoz, Idacio, Imraldi, Yuflyma, etc.</p> <p>Certolizumab Cimzia</p> <p>Infliximab Remicade</p>                          | <p><b>bDMARDs</b></p> <p><i>IL-23 inhibitor</i> Tildrakizumab Ilumya</p> <p>Guselkumab Tremfya</p> <p>Risankizumab Skyrizi</p> <p><i>IL-17 inhibitor</i> Brodalumab Siliq</p> <p>Secukinumab Cosentyx</p> <p>Ixekizumab Taltz</p> <p><i>IL-12 inhibitor</i> Ustekinumab Stelara</p> <p><b>csDMARDs</b></p> <p>Cyclosporine Neoral, Sandimmune, Gengraf</p> <p>Acitretin</p> <p>Apremilast* Otezla</p> <p>Methotrexate Otrexup, Rasuvo, RediTrex, Trexall, Xatmep</p>                                                                                                    |
| <p><b>Psoriatic Arthritis</b></p> | <p><b>bDMARDs</b></p> <p><i>Anti-TNFs</i> Adalimumab Humira, Amgevita, Hyrimoz, Idacio, Imraldi, Yuflyma, etc.</p> <p>Certolizumab Cimzia</p> <p>Infliximab Remicade</p> <p>Golimumab Simponi</p> | <p><b>bDMARDs</b></p> <p><i>T-cell costimulatory inhibitor</i> Abatacept Orenzia</p> <p><i>IL-17inhibitor</i> Brodalumab Siliq</p> <p>Secukinumab Cosentyx</p> <p>Ixekizumab Taltz</p> <p><i>IL-12 inhibitor</i> Ustekinumab Stelara</p> <p><b>csDMARDs</b></p> <p>Sulfasalazine* Azulfidine</p> <p>Cyclosporine* Neoral, Sandimmune, Gengraf</p> <p>Leflunomide* Arava</p> <p>Apremilast Otezla</p> <p>Methotrexate Otrexup, Rasuvo, RediTrex, Trexall, Xatmep</p> <p><b>tsDMARDs</b></p> <p><i>JAK inhibitors</i> Tofacitinib Xeljanz</p> <p>Upadacitinib† Rinvoq</p> |

Abbreviations: TNF = tumor necrosis factor; IL = interleukin; JAK = janus kinase; bDMARDs = biologic disease modifying anti-rheumatic drugs; csDMARDs = conventional disease modifying anti-rheumatic drugs; tsDMARDs = targeted synthetic disease modifying anti-rheumatic drugs; CD20 = cluster of differentiate 20; JIA = juvenile idiopathic arthritis

\*Recommended in the clinical guidelines, but not FDA-approved.<sup>6-9</sup>

† FDA-approved indication, but not recommended in the clinical guidelines

**Supplemental Table 10: Complete List of Potential Therapeutic Alternatives for Stelara (ustekinumab)**

| FDA-Approved Indications                                                                           | Potential Therapeutic Alternatives |                           |              |                                            |                 |                                                           |
|----------------------------------------------------------------------------------------------------|------------------------------------|---------------------------|--------------|--------------------------------------------|-----------------|-----------------------------------------------------------|
|                                                                                                    | <u>Within class</u>                |                           |              | <u>Outside of class</u>                    |                 |                                                           |
|                                                                                                    | Class                              | Generic                   | Brand        | Class                                      | Generic         | Brand                                                     |
| <b>Moderate to severe plaque psoriasis who are candidates for phototherapy or systemic therapy</b> | <b>bDMARDs</b>                     |                           |              | <b>bDMARDs</b>                             |                 |                                                           |
|                                                                                                    | <i>IL-12 inhibitor</i>             | (no other drugs in class) |              | <i>IL-23 inhibitor</i>                     | Tildrakizumab   | Ilumya                                                    |
|                                                                                                    |                                    |                           |              |                                            | Guselkumab      | Tremfya                                                   |
|                                                                                                    |                                    |                           |              |                                            | Risankizumab    | Skyrizi                                                   |
|                                                                                                    |                                    |                           |              | <i>IL-17 inhibitor</i>                     | Brodalumab      | Siliq                                                     |
|                                                                                                    |                                    |                           |              |                                            | Secukinumab     | Cosentyx                                                  |
|                                                                                                    |                                    |                           |              |                                            | Ixekizumab      | Taltz                                                     |
|                                                                                                    |                                    |                           |              | <i>Anti-TNFs</i>                           | Adalimumab      | Humira, Amgevita, Hyrimoz, Idacio, Imraldi, Yuflyma, etc. |
|                                                                                                    |                                    |                           |              |                                            | Certolizumab    | Cimzia                                                    |
|                                                                                                    |                                    |                           |              |                                            | Infliximab      | Remicade                                                  |
|                                                                                                    |                                    |                           |              |                                            | Etanercept      | Enbrel                                                    |
|                                                                                                    |                                    |                           |              |                                            | <b>csDMARDs</b> | Cyclosporine                                              |
|                                                                                                    |                                    |                           | Acitretin    |                                            |                 |                                                           |
|                                                                                                    |                                    |                           | Apremilast*  | Otezla                                     |                 |                                                           |
|                                                                                                    |                                    |                           | Methotrexate | Otrexup, Rasuvo, RediTrex, Trexall, Xatmep |                 |                                                           |
| <b>Active psoriatic arthritis, as monotherapy or combination therapy with MTX</b>                  | <b>bDMARDs</b>                     |                           |              | <b>bDMARDs</b>                             |                 |                                                           |
|                                                                                                    | <i>IL-12 inhibitor</i>             | (no other drugs in class) |              | <i>T-cell costimulatory inhibitor</i>      | Abatacept       | Orencia                                                   |
|                                                                                                    |                                    |                           |              | <i>IL-17 inhibitor</i>                     | Secukinumab     | Cosentyx                                                  |
|                                                                                                    |                                    |                           |              |                                            | Ixekizumab      | Taltz                                                     |
|                                                                                                    |                                    |                           |              |                                            | Brodalumab      | Siliq                                                     |
|                                                                                                    |                                    |                           |              | <i>IL-23 inhibitor</i>                     | Risankizumab†   | Skyrizi                                                   |
|                                                                                                    |                                    |                           |              |                                            | Guselkumab†     | Tremfya                                                   |
|                                                                                                    |                                    |                           |              |                                            |                 |                                                           |



|  |  |                        |                |                                                           |
|--|--|------------------------|----------------|-----------------------------------------------------------|
|  |  | <i>Anti-TNFs</i>       | Adalimumab     | Humira, Amgevita, Hyrimoz, Idacio, Imraldi, Yuflyma, etc. |
|  |  |                        | Certolizumab   | Cimzia                                                    |
|  |  |                        | Infliximab     | Remicade                                                  |
|  |  |                        | Golimumab      | Simponi                                                   |
|  |  |                        | Etanercept     | Enbrel                                                    |
|  |  | <b><i>csDMARDs</i></b> | Sulfasalazine* | Azulfidine                                                |
|  |  |                        | Cyclosporine * | Neoral, Sandimmune, Gengraf                               |
|  |  |                        | Leflunomide*   | Arava                                                     |
|  |  |                        | Apremilast     | Otezla                                                    |
|  |  |                        | Methotrexate   | Otrexup, Rasuvo, RediTrex, Trexall, Xatmep                |
|  |  | <b><i>tsDMARDs</i></b> |                |                                                           |
|  |  | <i>JAK inhibitors</i>  | Tofacitinib    | Xeljanz                                                   |
|  |  |                        | Upadacitinib†  | Rinvoq                                                    |

**Supplemental Table 10 Continued**

|                                                              |                                                                               |                                                                                                                                                                                                                                                                                                                                                                                                                                                                                                                                                    |
|--------------------------------------------------------------|-------------------------------------------------------------------------------|----------------------------------------------------------------------------------------------------------------------------------------------------------------------------------------------------------------------------------------------------------------------------------------------------------------------------------------------------------------------------------------------------------------------------------------------------------------------------------------------------------------------------------------------------|
| <p><b>Moderate to severely active Crohn's disease</b></p>    | <p><b>bDMARDs</b></p> <p><i>IL-12 inhibitor</i> (no other drugs in class)</p> | <p><b>csDMARDs</b></p> <p>Methotrexate* Otrexup, Rasuvo, RediTrex, Trexall, Xatmep</p> <p><b>bDMARDs</b></p> <p><i>Anti-TNFs</i></p> <p>Infliximab Remicade</p> <p>Adalimumab Humira, Amgevita, Hyrimoz, Idacio, Imraldi, Yuflyma, etc.</p> <p>Certolizumab Cimzia</p> <p><i>IL-23 inhibitor</i></p> <p>Risankizumab† Skyrizi</p> <p><i>Anti-alpha-4-beta-7 inhibitor</i></p> <p>Vedolizumab Entyvio</p> <p><i>alpha-4 inhibitor</i></p> <p>Natalizumab Tysabri</p> <p><b>tsDMARDs</b></p> <p><i>JAK inhibitor</i></p> <p>Upadacitinib† Rinvoq</p> |
| <p><b>Moderate to severely active ulcerative colitis</b></p> | <p><b>bDMARDs</b></p> <p><i>IL-12 inhibitor</i> (no other drugs in class)</p> | <p><b>bDMARDs</b></p> <p><i>Anti-TNFs</i></p> <p>Infliximab Remicade</p> <p>Adalimumab Humira, Amgevita, Hyrimoz, Idacio, Imraldi, Yuflyma</p> <p>Golimumab Simponi</p> <p><i>Anti-alpha-4-beta-7 inhibitor</i></p> <p>Vedolizumab Entyvio</p> <p><b>csDMARDs</b></p> <p>Methotrexate* Otrexup, Rasuvo, RediTrex, Trexall, Xatmep</p> <p><b>tsDMARDs</b></p> <p><i>JAK inhibitors</i></p> <p>Tofacitnib Xeljanz</p> <p>Upadacitinib † Rinvoq</p>                                                                                                   |

Abbreviations: TNF = tumor necrosis factor; IL = interleukin; JAK = janus kinase; bDMARDs = biologic disease modifying anti-rheumatic drugs; csDMARDs = conventional disease modifying anti-rheumatic drugs; tsDMARDs = targeted synthetic disease modifying anti-rheumatic drugs; MTX = methotrexate

\*Recommended in the clinical guidelines,<sup>6,7,10,11</sup> but not FDA-approved

†FDA-approved indication, but not recommended in clinical guidelines



**Supplemental Table 11: Complete List of Potential Therapeutic Alternatives for Imbruvica (ibrutinib)**

| FDA-Approved Indications                                                    | Potential Therapeutic Alternatives |                        |                         |                                       |                             |              |          |
|-----------------------------------------------------------------------------|------------------------------------|------------------------|-------------------------|---------------------------------------|-----------------------------|--------------|----------|
|                                                                             | <u>Within class</u>                |                        |                         | <u>Outside of class</u>               |                             |              |          |
|                                                                             | Class                              | Generic                | Brand                   | Class                                 | Generic                     | Brand        |          |
| <b>Chronic lymphocytic leukemia (CLL)/ Small lymphocytic lymphoma (SLL)</b> | <b>BTK inhibitors</b>              | Acalabrutinib          | Calquence               | <b>BCL-2 Inhibitors</b>               | Venetoclax                  | Venclexta    |          |
|                                                                             |                                    | Zanubrutinib           | Brukinsa                |                                       | <b>Anti-CD20</b>            | Rituximab    | Rituxan  |
|                                                                             |                                    | Pirtobrutinib*         | Jaypirca                |                                       |                             | Obinutuzumab | Gazyva   |
|                                                                             |                                    |                        |                         |                                       | <b>Anti-CD52</b>            | Alemtuzumab  | Lemtrada |
|                                                                             |                                    |                        | <b>PI3K inhibitor</b>   | Duvelisib                             | Coptikra                    |              |          |
|                                                                             |                                    |                        |                         | Idelalisib                            | Zydelig                     |              |          |
| <b>Waldenstrom's macroglobulinemia (WM)</b>                                 | <b>BTK inhibitors</b>              | Zanubrutinib           | Brukinsa                | <b>Anti-CD20</b>                      | Rituximab                   | Rituxan      |          |
|                                                                             |                                    | Acalabrutinib*         | Calquence               |                                       |                             | Ofatumumab*  | Arzerra  |
|                                                                             |                                    |                        |                         |                                       | <b>Proteasome inhibitor</b> | Bortezomib*  | Velcade  |
|                                                                             |                                    |                        |                         |                                       |                             | Carfilzomib* | Kyprolis |
|                                                                             |                                    |                        |                         |                                       |                             | Ixazomib*    | Ninlaro  |
|                                                                             |                                    |                        | <b>BCL-2 Inhibitors</b> | Venetoclax*                           | Venclexta                   |              |          |
| <b>Chronic graft versus host disease (cGVHD)</b>                            | <b>BTK inhibitors</b>              | no other drug approved |                         | <b>JAK inhibitor</b>                  | Ruxolitinib                 | Jakafi       |          |
|                                                                             |                                    |                        |                         | <b>Rho-kinase inhibitor</b>           | Belumosudil                 | Rezurock     |          |
|                                                                             |                                    |                        |                         | <b>T-cell costimulatory inhibitor</b> | Abatacept*                  | Orencia      |          |
|                                                                             |                                    |                        |                         | <b>Anti-CD52</b>                      | Alemtuzumab*                | Lemtrada     |          |
|                                                                             |                                    |                        |                         | <b>Anti-TNF</b>                       | Etanercept*                 | Enbrel       |          |
|                                                                             |                                    |                        |                         | <b>Anti-CD20</b>                      | Rituximab*                  | Rituxan      |          |

Abbreviations: BTK = bruton tyrosine kinase; JAK = janus kinase; BCL-2 = b-cell lymphoma 2; PI3K = phosphatidylinositol 3-kinase; CD = cluster of differentiate

Limited to Category 1 and 2A National Comprehensive Cancer Network recommendations<sup>12</sup>

\*Recommended in the clinical guidelines,<sup>12-14</sup> but not FDA-approved

## Supplemental References

1. January CT, Wann LS, Calkins H, et al. 2019 AHA/ACC/HRS Focused Update of the 2014 AHA/ACC/HRS Guideline for the Management of Patients With Atrial Fibrillation: A Report of the American College of Cardiology/American Heart Association Task Force on Clinical Practice Guidelines and the Heart Rhythm Society in Collaboration With the Society of Thoracic Surgeons. *Circulation*. 2019;140(2):e125-e151.
2. Ortel TL, Neumann I, Ageno W, et al. American Society of Hematology 2020 guidelines for management of venous thromboembolism: treatment of deep vein thrombosis and pulmonary embolism. *Blood Adv*. 2020;4(19):4693-4738.
3. Heidenreich PA, Bozkurt B, Aguilar D, et al. 2022 AHA/ACC/HFSA Guideline for the Management of Heart Failure: A Report of the American College of Cardiology/American Heart Association Joint Committee on Clinical Practice Guidelines. *Circulation*. 2022;145(18):e895-e1032.
4. ElSayed NA, Aleppo G, Aroda VR, et al. 9. Pharmacologic Approaches to Glycemic Treatment: Standards of Care in Diabetes-2023. *Diabetes Care*. 2023;46(Suppl 1):S140-S157.
5. Navaneethan SD, Zoungas S, Caramori ML, et al. Diabetes Management in Chronic Kidney Disease: Synopsis of the KDIGO 2022 Clinical Practice Guideline Update. *Ann Intern Med*. 2023;176(3):381-387.
6. Joint American Academy of Dermatology–National Psoriasis Foundation Guidelines of care for the management and treatment of psoriasis. Accessed October 31, 2023. <https://www.aad.org/member/clinical-quality/guidelines/psoriasis>
7. Singh JA, Guyatt G, Ogdie A, et al. 2018 American College of Rheumatology/National Psoriasis Foundation Guideline for the Treatment of Psoriatic Arthritis. *Arthritis Rheumatol*. 2019;71(1):5-32.
8. Ward MM, Deodhar A, Gensler LS, et al. 2019 Update of the American College of Rheumatology/Spondylitis Association of America/Spondyloarthritis Research and Treatment Network Recommendations for the Treatment of Ankylosing Spondylitis and Nonradiographic Axial Spondyloarthritis. *Arthritis Rheumatol*. 2019;71(10):1599-1613.
9. Fraenkel L, Bathon JM, England BR, et al. 2021 American College of Rheumatology Guideline for the Treatment of Rheumatoid Arthritis. *Arthritis Care Res*. 2021;73(7):924-939.
10. Lichtenstein GR, Loftus EV, Isaacs KL, Regueiro MD, Gerson LB, Sands BE. ACG Clinical Guideline: Management of Crohn's Disease in Adults. *Am J Gastroenterol*. 2018;113(4):481-517.
11. Feuerstein JD, Isaacs KL, Schneider Y, et al. AGA Clinical Practice Guidelines on the Management of Moderate to Severe Ulcerative Colitis. *Gastroenterology*. 2020;158(5):1450-1461.

12. National Comprehensive Cancer Network Drugs and Biologics Compendium. Accessed October 31, 2023. <https://www.nccn.org/compendia-templates/compendia/drugs-and-biologics-compendia>
13. Eichhorst B, Robak T, Montserrat E, et al. Chronic lymphocytic leukaemia: ESMO Clinical Practice Guidelines for diagnosis, treatment and follow-up. *Ann Oncol.* 2021;32(1):23-33.
14. National Comprehensive Cancer Network Guidelines for Patients Graft-Versus-Host Disease. Published September 30, 2021. Accessed October 31, 2023. <https://www.nccn.org/patients/guidelines/content/PDF/GVDH-patient-guideline.pdf>
